# Supplementary material
Source: publisher figshare collection journal article supplement (https://acs.figshare.com/ndownloader/files/16369889)

# checkCIF/PLATON report

You have not supplied any structure factors. As a result the full set of tests cannot be run.

THIS REPORT IS FOR GUIDANCE ONLY. IF USED AS PART OF A REVIEW PROCEDURE FOR PUBLICATION, IT SHOULD NOT REPLACE THE EXPERTISE OF AN EXPERIENCED CRYSTALLOGRAPHIC REFEREE.

No syntax errors found.      CIF dictionary      Interpreting this report

## Datablock: p180811c

---

|                        |                                              |                                     |
|------------------------|----------------------------------------------|-------------------------------------|
| Bond precision:        | C-C = 0.0110 Å                               | Wavelength=0.71073                  |
| Cell:                  | a=43.0260(4)                                 | b=43.0260(4)      c=43.0260(4)      |
|                        | alpha=90                                     | beta=90      gamma=90               |
| Temperature:           | 120 K                                        |                                     |
|                        | Calculated                                   | Reported                            |
| Volume                 | 79651(2)                                     | 79651.3(12)                         |
| Space group            | F m -3 m                                     | F m -3 m                            |
| Hall group             | -F 4 2 3                                     | ?                                   |
| Moiety formula         | C144 H120 N12 O40 Zr12,<br>6(Cl) [+ solvent] | ?                                   |
| Sum formula            | C144 H120 Cl6 N12 O40 Zr12<br>[+ solvent]    | C143.99 H119.99 Cl6 N12<br>O40 Zr12 |
| Mr                     | 3965.86                                      | 3965.54                             |
| Dx, g cm <sup>-3</sup> | 0.661                                        | 0.661                               |
| Z                      | 8                                            | 8                                   |
| Mu (mm <sup>-1</sup> ) | 0.371                                        | 0.371                               |
| F000                   | 15760.0                                      | 15760.0                             |
| F000'                  | 15485.49                                     |                                     |
| h,k,lmax               | 51,51,51                                     | 51,51,51                            |
| Nref                   | 3437                                         | 3432                                |
| Tmin,Tmax              |                                              |                                     |
| Tmin'                  |                                              |                                     |

Correction method= Not given

Data completeness= 0.999      Theta(max)= 25.000

R(reflections)= 0.0850( 2351)      wR2(reflections)= 0.2810( 3432)

S = 1.084      Npar= 127

---

The following ALERTS were generated. Each ALERT has the format

**test-name\_ALERT\_alert-type\_alert-level.**

Click on the hyperlinks for more details of the test.

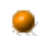

### Alert level B

PLAT990\_ALERT\_1\_B Deprecated .res/.hkl Input Style SQUEEZE Job ...

! Note

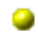

### Alert level C

PLAT052\_ALERT\_1\_C Info on Absorption Correction Method Not Given Please Do !  
PLAT053\_ALERT\_1\_C Minimum Crystal Dimension Missing (or Error) ... Please Check  
PLAT054\_ALERT\_1\_C Medium Crystal Dimension Missing (or Error) ... Please Check  
PLAT055\_ALERT\_1\_C Maximum Crystal Dimension Missing (or Error) ... Please Check  
PLAT084\_ALERT\_3\_C High wR2 Value (i.e. > 0.25) ..... 0.28 Report  
PLAT241\_ALERT\_2\_C High 'MainMol' Ueq as Compared to Neighbors of C2 Check  
PLAT241\_ALERT\_2\_C High 'MainMol' Ueq as Compared to Neighbors of C3 Check  
PLAT242\_ALERT\_2\_C Low 'MainMol' Ueq as Compared to Neighbors of Zr1 Check  
PLAT342\_ALERT\_3\_C Low Bond Precision on C-C Bonds ..... 0.011 Ang.

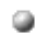

### Alert level G

FORMU01\_ALERT\_2\_G There is a discrepancy between the atom counts in the  
\_chemical\_formula\_sum and the formula from the \_atom\_site\* data.  
Atom count from \_chemical\_formula\_sum: Cl43.9899 H119.99 Cl6 N12 O40 Zr  
Atom count from the \_atom\_site data: Cl44 H120 Cl6 N12 O40 Zr12  
CELLZ01\_ALERT\_1\_G Difference between formula and atom\_site contents detected.  
CELLZ01\_ALERT\_1\_G ALERT: check formula stoichiometry or atom site occupancies.  
From the CIF: \_cell\_formula\_units\_Z 8  
From the CIF: \_chemical\_formula\_sum Cl43.99 H119.99 Cl6 N12 O40 Zr12  
TEST: Compare cell contents of formula and atom\_site data

| atom | Z*formula | cif sites | diff  |
|------|-----------|-----------|-------|
| C    | 1151.92   | 1152.00   | -0.08 |
| H    | 959.92    | 960.00    | -0.08 |
| Cl   | 48.00     | 48.00     | 0.00  |
| N    | 96.00     | 96.00     | 0.00  |
| O    | 320.00    | 320.00    | 0.00  |
| Zr   | 96.00     | 96.00     | 0.00  |

PLAT002\_ALERT\_2\_G Number of Distance or Angle Restraints on AtSite 11 Note  
PLAT003\_ALERT\_2\_G Number of Uiso or Uij Restrained non-H Atoms ... 9 Report  
PLAT005\_ALERT\_5\_G No Embedded Refinement Details Found in the CIF Please Do !  
PLAT007\_ALERT\_5\_G Number of Unrefined Donor-H Atoms ..... 4 Report  
PLAT041\_ALERT\_1\_G Calc. and Reported SumFormula Strings Differ Please Check  
PLAT072\_ALERT\_2\_G SHELXL First Parameter in WGHT Unusually Large 0.15 Report  
PLAT083\_ALERT\_2\_G SHELXL Second Parameter in WGHT Unusually Large 509.43 Why ?  
PLAT152\_ALERT\_1\_G The Supplied and Calc. Volume s.u. Differ by ... 8 Units  
PLAT180\_ALERT\_4\_G Check Cell Rounding: # of Values Ending with 0 = 3 Note  
PLAT300\_ALERT\_4\_G Atom Site Occupancy of C6 Constrained at 0.5 Check  
PLAT300\_ALERT\_4\_G Atom Site Occupancy of C7 Constrained at 0.5 Check  
PLAT300\_ALERT\_4\_G Atom Site Occupancy of C9 Constrained at 0.5 Check  
PLAT300\_ALERT\_4\_G Atom Site Occupancy of Cl0 Constrained at 0.5 Check  
PLAT300\_ALERT\_4\_G Atom Site Occupancy of N1 Constrained at 0.25 Check  
PLAT300\_ALERT\_4\_G Atom Site Occupancy of N2 Constrained at 0.25 Check  
PLAT300\_ALERT\_4\_G Atom Site Occupancy of H7 Constrained at 0.5 Check  
PLAT300\_ALERT\_4\_G Atom Site Occupancy of H10 Constrained at 0.5 Check  
PLAT300\_ALERT\_4\_G Atom Site Occupancy of H1A Constrained at 0.25 Check  
PLAT300\_ALERT\_4\_G Atom Site Occupancy of H1B Constrained at 0.25 Check  
PLAT300\_ALERT\_4\_G Atom Site Occupancy of H2A Constrained at 0.25 Check  
PLAT300\_ALERT\_4\_G Atom Site Occupancy of H2B Constrained at 0.25 Check  
PLAT301\_ALERT\_3\_G Main Residue Disorder .....(Resd 1 ) 29% Note

|                   |                                                    |                       |       |       |
|-------------------|----------------------------------------------------|-----------------------|-------|-------|
| PLAT304_ALERT_4_G | Non-Integer Number of Atoms in .....               | Resd 2                | 0.25  | Check |
| PLAT606_ALERT_4_G | VERY LARGE Solvent Accessible VOID(S) in Structure |                       | !     | Info  |
| PLAT764_ALERT_4_G | Overcomplete CIF Bond List Detected (Rep/Expd)     | .                     | 1.30  | Ratio |
| PLAT779_ALERT_4_G | Suspect or Irrelevant (Bond) Angle in CIF .... #   |                       | 85    | Check |
|                   | C9 -C5 -C6                                         | 1.555 1.555 1.555     | 27.20 | Deg.  |
| PLAT779_ALERT_4_G | Suspect or Irrelevant (Bond) Angle in CIF .... #   |                       | 88    | Check |
|                   | C9 -C5 -C6                                         | 187.000 1.555 187.000 | 27.20 | Deg.  |
| PLAT779_ALERT_4_G | Suspect or Irrelevant (Bond) Angle in CIF .... #   |                       | 95    | Check |
|                   | C7 -C8 -C10                                        | 187.000 1.555 187.000 | 25.80 | Deg.  |
| PLAT779_ALERT_4_G | Suspect or Irrelevant (Bond) Angle in CIF .... #   |                       | 98    | Check |
|                   | C7 -C8 -C10                                        | 1.555 1.555 1.555     | 25.80 | Deg.  |
| PLAT794_ALERT_5_G | Tentative Bond Valency for Zr1 (IV)                | .                     | 4.17  | Info  |
| PLAT860_ALERT_3_G | Number of Least-Squares Restraints .....           |                       | 61    | Note  |
| PLAT869_ALERT_4_G | ALERTS Related to the Use of SQUEEZE Suppressed    |                       | !     | Info  |
| PLAT899_ALERT_4_G | SHELXL97 is Deprecated and Succeeded by SHELXL     |                       | 2018  | Note  |

---

0 **ALERT level A** = Most likely a serious problem - resolve or explain  
 1 **ALERT level B** = A potentially serious problem, consider carefully  
 9 **ALERT level C** = Check. Ensure it is not caused by an omission or oversight  
 36 **ALERT level G** = General information/check it is not something unexpected

9 ALERT type 1 CIF construction/syntax error, inconsistent or missing data  
 8 ALERT type 2 Indicator that the structure model may be wrong or deficient  
 4 ALERT type 3 Indicator that the structure quality may be low  
 22 ALERT type 4 Improvement, methodology, query or suggestion  
 3 ALERT type 5 Informative message, check

---

It is advisable to attempt to resolve as many as possible of the alerts in all categories. Often the minor alerts point to easily fixed oversights, errors and omissions in your CIF or refinement strategy, so attention to these fine details can be worthwhile. In order to resolve some of the more serious problems it may be necessary to carry out additional measurements or structure refinements. However, the purpose of your study may justify the reported deviations and the more serious of these should normally be commented upon in the discussion or experimental section of a paper or in the "special\_details" fields of the CIF. checkCIF was carefully designed to identify outliers and unusual parameters, but every test has its limitations and alerts that are not important in a particular case may appear. Conversely, the absence of alerts does not guarantee there are no aspects of the results needing attention. It is up to the individual to critically assess their own results and, if necessary, seek expert advice.

### Publication of your CIF in IUCr journals

A basic structural check has been run on your CIF. These basic checks will be run on all CIFs submitted for publication in IUCr journals (*Acta Crystallographica*, *Journal of Applied Crystallography*, *Journal of Synchrotron Radiation*); however, if you intend to submit to *Acta Crystallographica Section C* or *E* or *IUCrData*, you should make sure that full publication checks are run on the final version of your CIF prior to submission.

### Publication of your CIF in other journals

Please refer to the *Notes for Authors* of the relevant journal for any special instructions relating to CIF submission.

Datablock p180811c - ellipsoid plot

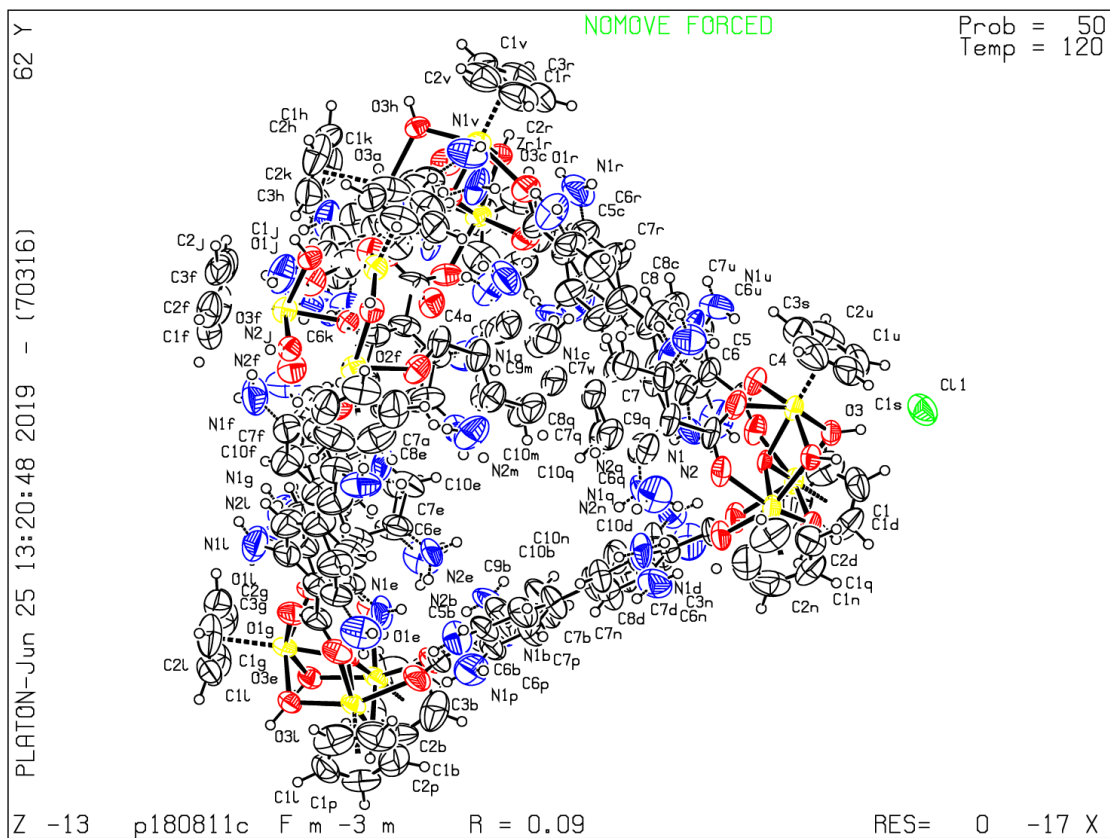

Supplement: Supplementary file 1 [file 16369889]
